# Supplementary material
Source: PubMed Central journal article supplement (PMC4005492)
Supplement: Supp_Figure1.pdf [file Supp_Figure1.pdf]

## Supplementary Data

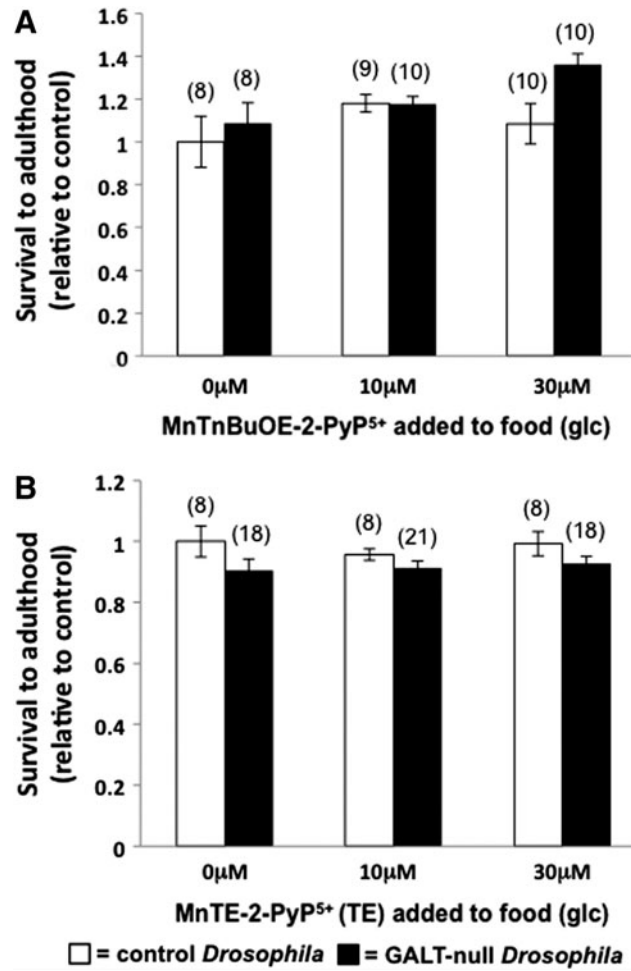

SUPPLEMENTARY FIG. S1. Impact of small molecule superoxide dismutase mimics MnTnBuOE-2-PyP<sup>5+</sup> and MnTE-2-PyP<sup>5+</sup> on survival of control and GALT-null *Drosophila* larvae in foods containing glucose as the only sugar. Relative survival of control (open bars) and GALT-null (shaded bars) *Drosophila* larvae to adulthood monitored in food that contained 555 mM glucose as the sole added sugar together with the indicated levels of MnTnBuOE-2-PyP<sup>5+</sup> (A) and MnTE-2-PyP<sup>5+</sup> (B). The number of cohort replicates for each experimental condition is indicated in parentheses above the corresponding bar. Values plotted represent average ± standard error of the mean,  $n \geq 8$ , as indicated. None of the values plotted were significantly different from each other.
