# Supplementary material
Source: PubMed Central journal article supplement (PMC4005492)
Supplement: Supp_Figure2.pdf [file Supp_Figure2.pdf]

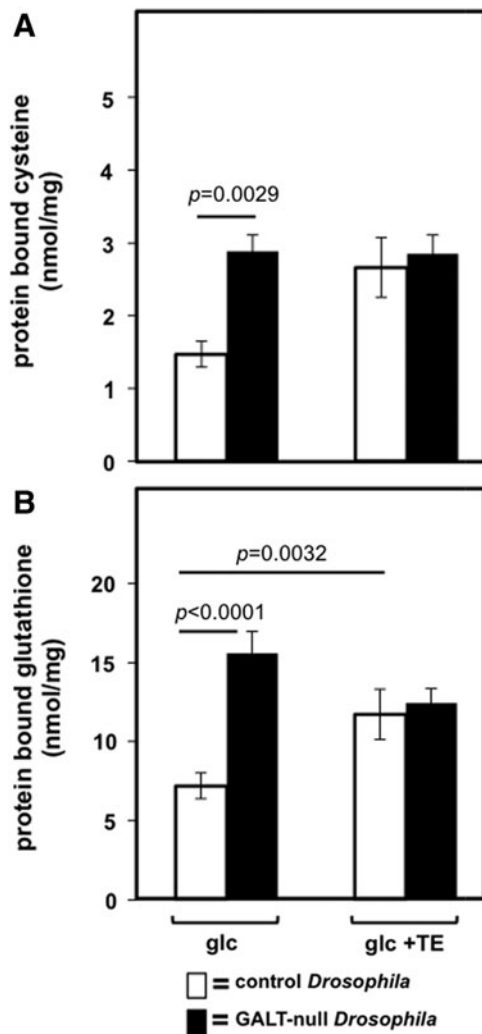

SUPPLEMENTARY FIG. S2. Impact of MnTE-2-PyP<sup>5+</sup> on the abundance of protein-bound glutathione and cysteine in control and GALT-null *Drosophila* early larvae (L2) reared in the absence of dietary galactose. Samples tested were from control (open bars) and GALT-null (shaded bars) second instar (L2) larvae harvested from foods containing 555 mM glucose as the sole added sugar that did *versus* did not contain 10  $\mu$ M MnTE-2-PyP<sup>5+</sup>, as indicated. Values plotted represent average  $\pm$  standard error of the mean,  $n=6$ . (A) Levels of protein-bound cysteine, and (B) levels of protein-bound glutathione, are plotted. Significant differences are indicated.
