# Supplementary material
Source: PubMed Central journal article supplement (PMC4005492)
Supplement: Supp_Figure3.pdf [file Supp_Figure3.pdf]

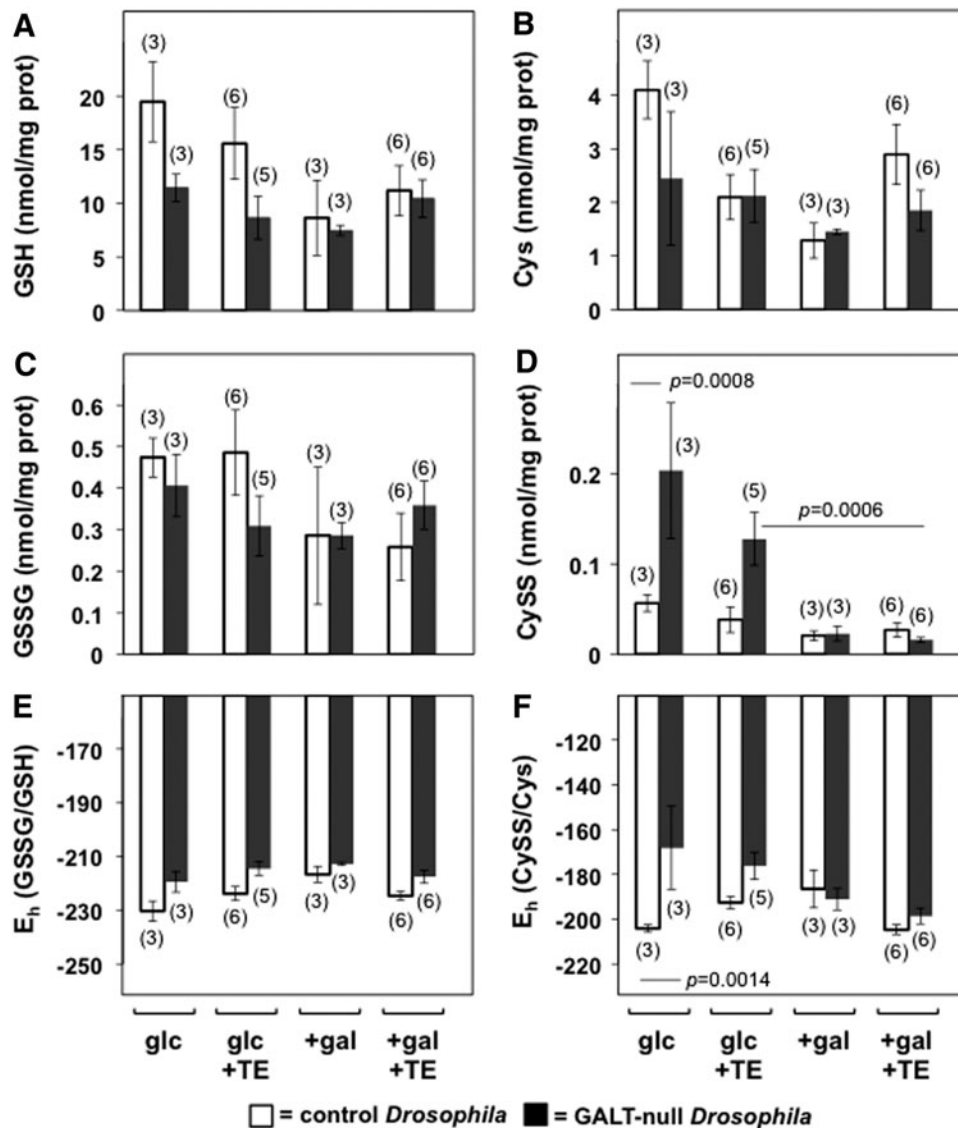

SUPPLEMENTARY FIG. S3. Impact of MnTE-2-PyP<sup>5+</sup> on soluble reduced and oxidized glutathione and cysteine levels in control and GALT-null *Drosophila* second instar larvae reared in the presence *versus* absence of dietary galactose. Samples tested were from control (open bars) and GALT-null (shaded bars) second instar (L2) larvae harvested from foods that did *versus* did not contain 200 mM galactose (in addition to 555 mM glucose), as indicated, and also that did *versus* did not contain 10  $\mu$ M MnTE-2-PyP<sup>5+</sup>, as indicated. (A) Levels of reduced glutathione (GSH), (B) levels of reduced cysteine (Cys), (C) levels of oxidized glutathione (GSSG), (D) levels of cystine (CySS), (E) intracellular redox state estimated from the GSH and GSSG levels, (F) extracellular redox state estimated from the Cys and CySS levels. The number of replicates for each experimental condition is indicated in parenthesis above the corresponding bar. Values plotted represent average  $\pm$  standard error of the mean,  $n \geq 3$ , as indicated. Significant differences are indicated.
