# Supplementary material
Source: PubMed Central journal article supplement (PMC4005492)
Supplement: Supp_Figure4.pdf [file Supp_Figure4.pdf]

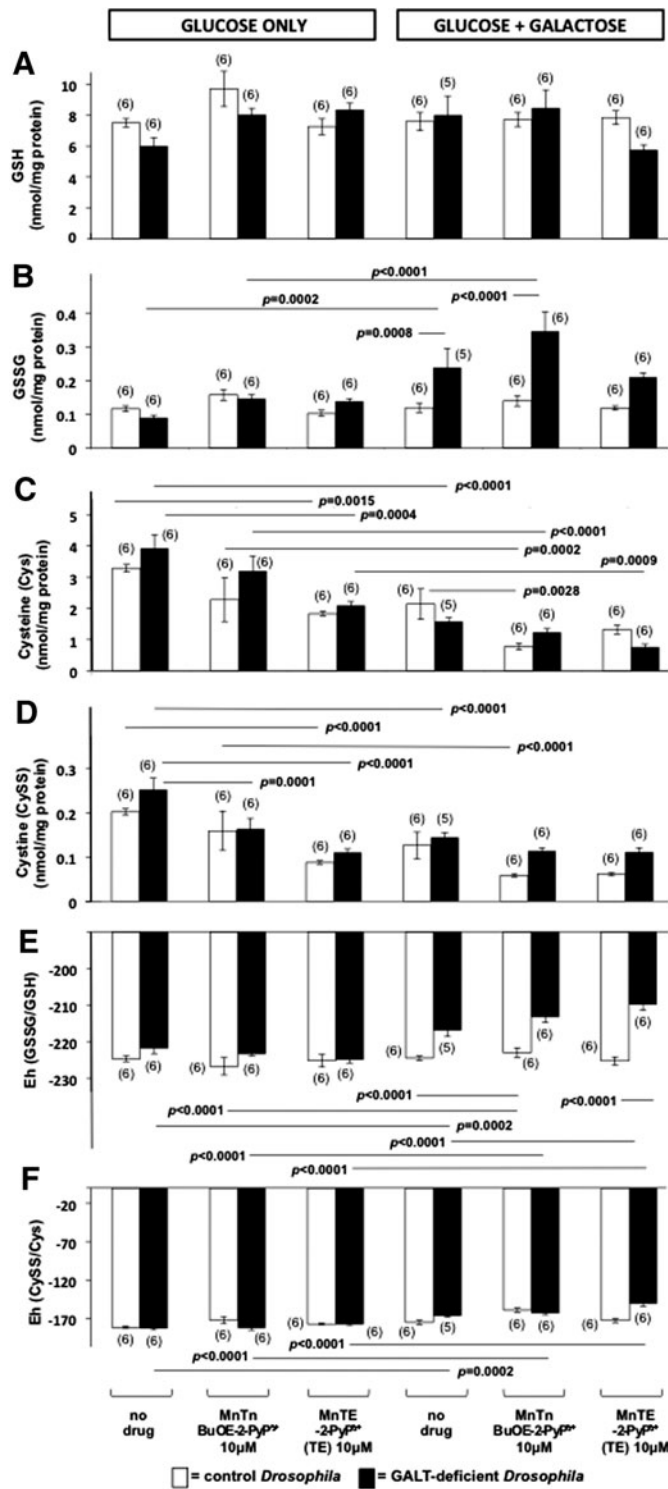

SUPPLEMENTARY FIG. S4. Impact of small molecule superoxide dismutase mimics, MnTnBuOE-2-PyP<sup>5+</sup> and MnTE-2-PyP<sup>5+</sup>, on soluble reduced and oxidized glutathione and cysteine levels in control and GALT-null *Drosophila* late larvae (L3) reared in the presence *versus* absence of dietary galactose. Samples tested were from control (open bars) and GALT-null (shaded bars) third instar larvae harvested from foods that did (*right* three sets of bars) *versus* did not (*left* three sets of bars) contain 200 mM galactose (in addition to 555 mM glucose), and also that did or did not contain 10 μM MnTnBuOE-2-PyP<sup>5+</sup> or MnTE-2-PyP<sup>5+</sup>, as indicated. (A) Levels of reduced glutathione (GSH), (B) levels of oxidized glutathione (GSSG), (C) levels of reduced cysteine (Cys), (D) levels of cystine (CySS), (E) intracellular redox state estimated from the GSH and GSSG levels, (F) extracellular redox state estimated from the Cys and CySS levels. The number of replicates for each experimental condition is indicated in parenthesis near the corresponding bar. Values plotted represent average ± standard error of the mean,  $n \geq 5$ . Significant differences are indicated.
